# Supplementary material
Source: PubMed Central journal article supplement (PMC3962246)
Supplement: supp_mcu006_mcu006supp.pdf [file supp_mcu006_mcu006supp.pdf]

## SUPPLEMENTARY DATA

Table S1. List of references used to construct a phylogeny to examine floral resource use of garden plants by bumble-bees in Plymouth, Devon, England.

---

### ANGIOSPERMS

**Angiosperm Phylogeny Group III. 2009.** An update of the Angiosperm Phylogeny Group classification for the orders and families of flowering plants: APG III. *Botanical Journal of the Linnean Society* **161**: 105–121.

**Stevens PF.** 2001 onwards. Angiosperm Phylogeny Website. Version 12, July 2012.  
<http://www.mobot.org/MOBOT/research/APweb/>

### ASPARAGACEAE

**Chase MW, Reveal JL, Fay MF. 2009.** A subfamilial classification for the expanded asparagalean families Amaryllidaceae, Asparagaceae and Xanthorrhoeaceae. *Botanical Journal of the Linnean Society* **161**: 132–136.

**Kim J-H, Kim D-K, Forest F, Fay, MF, Chase MW. 2010.** Molecular phylogenetics of Ruscaceae *sensu lato* and related families (Asparagales) based on plastid and nuclear DNA sequences. *Annals of Botany* **106**: 775–790.

### ASTERACEAE

**Funk VA, Susanna A, Stuessy T, Robinson H. 2009.** Classification of Compositae. In: Funk VA, Susanna A, Stuessy T., Bayer R (eds), Systematics, Evolution, and Biogeography of Compositae, pp. 171-189. International Association for Plant Taxonomy, Vienna.

**Funk VA, Anderberg AA, Baldwin BG, et al., 2009.** Compositae metatrees: the next generation. In: Funk VA, Susanna A, Stuessy T., Bayer R (eds), Systematics, Evolution, and Biogeography of Compositae, pp. 747-777. International Association for Plant Taxonomy, Vienna.

**Goertzen LR, Cannone JJ, Gutell RR, Robert K. Jansen RK. 2003.** ITS secondary structure derived from comparative analysis: implications for sequence alignment and phylogeny of the Asteraceae. *Molecular Phylogenetics and Evolution* **29**: 216-234.

**Panero JL, Funk VA. 2002.** Toward a phylogenetic subfamilial classification for the Compositae (Asteraceae). *Proceedings of the Biological Society of Washington* **115**: 760-773.

### BRASSICACEAE

**Bailey CD, Koch MA, Mayer M, et al., 2006.** Toward a global phylogeny of the Brassicaceae. *Molecular Biology and Evolution* **23**: 2142-2160.

**Hall JC, Sytsma KJ, Iltis HH. 2002.** Phylogeny of Capparaceae and Brassicaceae based on chloroplast sequence data. *American Journal of Botany* **89**: 1826–1842.

### CAMPANULACEAE

**Eddie WMM, Shulkina T, Gaskin J, Haberle RC, Jansen RK. 2003.** Phylogeny of Campanulaceae S. Str. inferred from its sequences of nuclear ribosomal DNA. *Annals of the Missouri Botanical Garden* **90**: 554–575.

## GERANIACEAE

**Fiz O, Vargas P, Alarcón M., Aedo C, García JL, Aldasoro JJ. 2008.** Phylogeny and historical biogeography of Geraniaceae in relation to climate changes and pollination ecology. *Systematic Botany* **33**: 326-342.

## IRIDACEAE

**Reeves G, Chase MW, Goldblatt P, et al., 2001.** Molecular systematics of Iridaceae: evidence from four plastid DNA regions. *American Journal of Botany* **88**: 2074–2087

## PLANTAGINACEAE

**Albach DC, Meudt HM, Oxelman B. 2005.** Piecing together the “new” Plantaginaceae. *American Journal of Botany* **92**: 297–315.

## ROSACEAE

**Potter D, Eriksson T, Evans RC, et al., 2007.** Phylogeny and classification of Rosaceae. *Plant Systematics and Evolution* **266**: 5–43.

---

Table S2. Total number of visits to garden plants by five British bumble-bee (*Bombus*) species recorded in urban gardens in Plymouth, Devon, England.

| Plant species                                   | Biogeographic region | <i>Bombus</i> species |                   |                  |                 |                   | TOTAL Visits |
|-------------------------------------------------|----------------------|-----------------------|-------------------|------------------|-----------------|-------------------|--------------|
|                                                 |                      | <i>hortorum</i>       | <i>lapidarius</i> | <i>pascuorum</i> | <i>pratorum</i> | <i>terrestris</i> |              |
| <i>Allium giganteum</i> Regel.                  | Palaeartic           | 0                     | 1                 | 0                | 0               | 0                 | 1            |
| <i>Alstroemeria</i> spp. L.                     | Western Neotropical  | 1                     | 0                 | 0                | 0               | 0                 | 1            |
| <i>Calendula officinalis</i> L.                 | Palaeartic           | 0                     | 4                 | 2                | 0               | 1                 | 7            |
| <i>Callistemon viminalis</i> (Gaertn.) G.Don    | Australasian         | 0                     | 1                 | 0                | 0               | 1                 | 2            |
| <i>Campanula poscharskyana</i> Degen            | Palaeartic           | 0                     | 77                | 0                | 9               | 2                 | 88           |
| <i>Ceanothus</i> spp. L.                        | Western Nearctic     | 0                     | 22                | 0                | 18              | 6                 | 46           |
| <i>Centranthus ruber</i> L. DC.                 | Palaeartic           | 4                     | 0                 | 0                | 0               | 0                 | 4            |
| <i>Cordyline australis</i> (Forst. f.) Hook. f. | Australasian         | 3                     | 1                 | 0                | 0               | 3                 | 7            |
| <i>Crepis capillaris</i> (L.) Wallr.            | British native       | 3                     | 4                 | 0                | 0               | 0                 | 7            |
| <i>Cymbalaria muralis</i> Baumg.                | Palaeartic           | 0                     | 3                 | 0                | 1               | 0                 | 4            |
| <i>Deutzia</i> spp. Thunb.                      | Oriental             | 3                     | 3                 | 0                | 5               | 20                | 31           |
| <i>Digitalis purpurea</i> L.                    | British native       | 25                    | 0                 | 6                | 0               | 5                 | 36           |
| <i>Erodium cicutarium</i> L.                    | British native       | 0                     | 1                 | 0                | 0               | 0                 | 1            |
| <i>Eryngium</i> spp. L.                         | Palaeartic           | 0                     | 2                 | 0                | 0               | 1                 | 3            |
| <i>Escallonia</i> spp. Mutis.                   | East Neotropical     | 0                     | 1                 | 0                | 0               | 0                 | 1            |
| <i>Fuchsia magellanica</i> Lam.                 | South Neotropical    | 0                     | 0                 | 1                | 0               | 0                 | 1            |
| <i>Galium odoratum</i> (L.) Scop.               | British native       | 0                     | 0                 | 0                | 0               | 1                 | 1            |
| <i>Geranium phaeum</i> L.                       | Palaeartic           | 0                     | 0                 | 0                | 1               | 1                 | 2            |
| <i>Geranium pyrenaicum</i> Burm. f.             | Palaeartic           | 0                     | 0                 | 1                | 1               | 1                 | 3            |
| <i>Geranium robertianum</i> L.                  | British native       | 0                     | 1                 | 0                | 0               | 0                 | 1            |
| <i>Gladiolus palustris</i> Gaudin               | Palaeartic           | 0                     | 0                 | 0                | 0               | 2                 | 2            |
| <i>Hebe elliptica</i> (G. Forst.) Pennell       | Australasian         | 1                     | 4                 | 0                | 0               | 0                 | 5            |
| <i>Hebe x franciscana</i> (Eastw.)Souster.      | Australasian         | 1                     | 39                | 1                | 4               | 31                | 76           |
| <i>Heuchera</i> 'Harmonic Convergence' L.       | Western Nearctic     | 0                     | 2                 | 0                | 1               | 0                 | 3            |
| <i>Hypericum patulum</i> Thunb.                 | Oriental             | 0                     | 0                 | 0                | 0               | 3                 | 3            |
| <i>Lamprocapnos spectabilis</i> (L.) Fukuhara   | Palaeartic           | 0                     | 0                 | 1                | 0               | 0                 | 1            |
| <i>Lavandula angustifolia</i> Mill.             | Palaeartic           | 2                     | 1                 | 10               | 1               | 12                | 26           |
| <i>Lilium philadelphicum</i> L.                 | Eastern Nearctic     | 0                     | 6                 | 0                | 1               | 0                 | 7            |
| <i>Linaria purpurea</i> (L.) Mill.              | Palaeartic           | 1                     | 0                 | 2                | 1               | 0                 | 4            |
| <i>Lobelia erinus</i> L.                        | Afrotropic           | 0                     | 4                 | 1                | 0               | 2                 | 7            |
| <i>Meconopsis cambrica</i> (L.) Vig.            | British native       | 0                     | 1                 | 0                | 0               | 7                 | 8            |
| <i>Ranunculus repens</i> L.                     | British native       | 0                     | 5                 | 1                | 0               | 0                 | 6            |
| <i>Rosa rugosa</i> Thunb.                       | Oriental             | 0                     | 3                 | 0                | 3               | 6                 | 12           |
| <i>Rubus fruticosus</i> L.                      | British native       | 6                     | 4                 | 4                | 0               | 4                 | 18           |
| <i>Trifolium repens</i> L.                      | British native       | 0                     | 2                 | 0                | 0               | 0                 | 2            |
| <i>Viola tricolor</i> L.                        | British native       | 0                     | 0                 | 0                | 0               | 1                 | 1            |
| <b>TOTAL BEES</b>                               |                      | <b>50</b>             | <b>192</b>        | <b>30</b>        | <b>46</b>       | <b>110</b>        | <b>428</b>   |
